# Supplementary material for: The <em>Theses on Feuerbach</em> and Decolonising Methodology: A Parallel Walking
Source: Preprints.org preprint supplement (doi:10.20944/preprints202005.0224.v1), 2020-05-13
Supplement: Supplementary file 1 [file supplementary]

Jahid Siraz (Corresponding Author)

E: [ava180043@siswa.um.edu.my](mailto:ava180043@siswa.um.edu.my)

| **Jahid Siraz** | | |
| --- | --- | --- |
|  | | |
| PhD fellow, Department of Social Administration and Justice | | |
| Faculty of Arts and Social Sciences | | |
| [ava180043@siswa.um.edu.my](mailto:ava180043@siswa.um.edu.my) | | |
| +6011 69 37 1323 | | |
| +603-79675475 | | |
|  | | |
| EDUCATION  Masters in Anthropology  Shahjalal University of Science and Technology, Sylhet Bangladesh  TEACHING EXPERIENCE  Assistant Professor of Anthropology 2004-2012,  Shahjalal University of Science and Technology, Sylhet Bangladesh  Teaching Assistant, University of Victoria, 2012-2016  Melbourne, Australia  Research Fellow  University of South Pacific, Fiji 2013-2014 | | |
|  | | |
|  |  |  |

| **ASSOCIATE PROF. DR. HARIS BIN ABD WAHAB** | | |
| --- | --- | --- |
|  | | |
| Department of Social Administration and Justice | | |
| Faculty of Arts and Social Sciences | | |
| [haris@um.edu.my](mailto:haris@um.edu.my) | | |
| +603-79675601 | | |
| +603-79675475 | | |
|  | | |
| Department of Social Administration and Justice, Faculty of Arts and Social Sciences, University of Malaya, 50603 Kuala Lumpur, W.Persekutuan Kuala Lumpur, Malaysia   - PHD(2009) (UM), UNIVERSITY OF MALAYA (UM) - MSC(1997) (UPM), UNIVERSITI PUTRA MALAYSIA (UPM) - BSC(1993) (UPM), UNIVERSITI PUTRA MALAYSIA (UPM) | | |
|  | | |
| ResearcherID Link | <http://www.researcherid.com/rid/B-8596-2010> |  |

| **DR. MOHD RASHID BIN MOHD SAAD** | |
| --- | --- |
|  | |
| Department of Language and Literacy Education | |
| Faculty of Education | |
|  | |
| 79675020 | |
| 79675087 | |
| msaadmr@um.edu.my | |
| Department of Language and Literacy Education, Faculty of Education, University of Malaya, 50603 Kuala Lumpur, W.Persekutuan Kuala Lumpur, Malaysia | |
|  | |
| ResearcherID Link: <http://www.researcherid.com/rid/B-9111-2010> |  |  |
